# Supplementary material for: Aerobic exercise improves verbal working memory sub-processes in adolescents: behavioral evidence from an N-back task
Source: PeerJ. 2024 Apr 30;12:e17331. doi: 10.7717/peerj.17331 (PMC11067889; doi:10.7717/peerj.17331)
Supplement: Supplemental Information 1 [file peerj-12-17331-s001.xlsx]

## Sheet: 实验1
High Exercise Habits Group		Verbal working memory								Low Exercise Habits Group		Verbal working memory
		Accuracy			Reaction time			Sub-process				Accuracy			Reaction time			Sub-process
	score	0-back	1-back	2-back	0-back	1-back	2-back	Updating	Maintenance		score	0-back	1-back	2-back	0-back	1-back	2-back	Updating	Maintenance	整体
	4	1	1	0.88	651.89	731.98	825.33	80.09	93.35		0	0.96	0.91	0.71	961.74	1201.22	1369.78	239.48	168.56
	5	1	0.98	0.78	558.55	635.51	752.68	76.96	117.17		0	0.92	0.95	0.74	1008.09	1218.06	1384.92	209.97	166.86
	5	0.97	0.97	0.75	581.83	665.84	782.35	84.01	116.51		2	0.9	0.93	0.78	853.59	994.66	1156.56	141.07	161.9
	7	0.97	1	0.75	583.03	676.35	790.26	93.32	113.91		1	0.92	0.91	0.74	844.87	1003.98	1169.85	159.11	165.87
	4	1	1	0.77	705.66	807.16	922.14	101.5	114.98		0	0.93	0.97	0.71	964.36	1172.25	1369.41	207.89	197.16
	5	0.97	1	0.84	598.25	689.27	816.74	91.02	127.47		3	0.97	0.95	0.79	823.88	974.75	1145.22	150.87	170.47
	4	0.97	0.97	0.73	630.73	718.25	842.1	87.52	123.85		1	0.96	0.9	0.76	946.81	1129.64	1327.5	182.83	197.86
	4	0.97	0.97	0.82	682.19	751.34	855.46	69.15	104.12		3	0.97	0.98	0.78	796.69	952.75	1138.65	156.06	185.9
	6	0.97	1	0.83	503.78	622.14	740.98	118.36	118.84		2	0.94	0.93	0.71	809.63	963.47	1143.95	153.84	180.48
	7	0.97	0.93	0.8	582.86	659.58	784.28	76.72	124.7		3	0.97	0.93	0.74	832.3	974.27	1159.75	141.97	185.48
	4	0.99	1	0.83	596.45	687.52	817.31	91.07	129.79		3	0.9	0.88	0.74	816.39	981.09	1150.94	164.7	169.85
	6	0.98	0.98	0.83	540.41	614.81	736.27	74.4	121.46		1	0.98	0.97	0.81	928.29	1128.13	1285.55	199.84	157.42
	5	0.98	0.97	0.85	646.41	727.75	857.26	81.34	129.51		3	0.92	0.95	0.8	864.22	986.06	1183.66	121.84	197.6
	5	0.98	0.97	0.81	639.4	737.68	856.04	98.28	118.36		3	0.98	0.88	0.69	879.09	995.56	1159.34	116.47	163.78
	4	1	1	0.84	697.06	786.84	906.88	89.78	120.04		0	0.93	0.92	0.71	960.44	1146.03	1323.79	185.59	177.76
	6	1	1	0.74	585.47	665.47	782.03	80	116.56		0	0.98	0.94	0.72	1001.79	1184.28	1347.23	182.49	162.95
	5	1	1	0.86	628.27	722.43	847.5	94.16	125.07		0	0.98	0.94	0.8	929.29	1085.95	1262.86	156.66	176.91
	5	1	1	0.78	671.3	753.92	866.28	82.62	112.36		1	0.94	0.94	0.73	906.48	1104.36	1265.45	197.88	161.09
	4	0.98	0.98	0.82	592.27	686.08	795.67	93.81	109.59		2	0.97	0.92	0.66	784.47	943.59	1128.27	159.12	184.68
	5	1	1	0.82	676.25	764.36	892.38	88.11	128.02		2	0.94	0.84	0.71	833.63	996.87	1191.06	163.24	194.19

## Sheet: 实验2
Pretest	Verbal working memory								Posttest	Verbal working memory								Eighteenth Test	Verbal working memory
	Accuracy			Reaction time			Updating	Maintenance		Accuracy			Reaction time			Updating	Maintenance		Accuracy			Reaction time			Updating	Maintenance
Intervention Group	0-back	1-back	2-back	0-back	1-back	2-back	SX	WC	Intervention Group	0-back	1-back	2-back	0-back	1-back	2-back	SX	WC	Intervention Group	0-back	1-back	2-back	0-back	1-back	2-back	SX	WC
	0.94	0.92	0.7	839.13	925.87	1264.97	86.74	339.1		0.96	0.95	0.78	645.53	785.47	948.21	139.94	162.74		0.98	1	0.92	523.13	614.73	746.14	91.6	131.41
	0.95	0.94	0.74	656.97	834.5	1091.66	177.53	257.16		0.96	0.91	0.82	648.47	757.11	987.35	108.64	230.24		0.98	0.98	0.82	531.7	628.42	764.73	96.72	136.31
	0.95	0.91	0.73	769.45	909.87	1114.97	140.42	205.1		0.97	0.94	0.73	653.94	766.94	898.37	113	131.43		1	1	0.82	656.23	727.63	801.47	71.4	73.84
	0.94	0.92	0.62	662.98	815.66	1008.42	152.68	192.76		0.96	0.94	0.72	682.95	811.6	928.23	128.65	116.63		0.98	0.97	0.87	493.17	547.9	707.65	54.73	159.75
	0.96	0.9	0.6	715.9	854.27	1022.91	138.37	168.64		0.97	0.89	0.7	705.9	847.87	986.31	141.97	138.44		0.98	0.98	0.9	570.52	643.27	803.31	72.75	160.04
	0.94	0.91	0.67	645.92	838.79	1172.44	192.87	333.65		0.96	0.94	0.72	723.6	835.65	949.03	112.05	113.38		1	0.97	0.9	494.23	546.34	654.31	52.11	107.97
	0.94	0.9	0.7	670.03	812.35	1031.76	142.32	219.41		0.95	0.97	0.8	677.56	792.84	1017.21	115.28	224.37		0.98	0.98	0.87	571	665.63	759.92	94.63	94.29
	0.94	0.94	0.68	734.26	895.44	1151.23	161.18	255.79		0.94	0.94	0.7	682.48	820.95	1002.46	138.47	181.51		0.98	0.97	0.83	574.37	637.61	721.57	63.24	83.96
	0.95	0.89	0.61	689.95	903.42	1204.52	213.47	301.1		0.95	0.95	0.69	601.34	717.44	879.82	116.1	162.38		0.98	0.98	0.82	623.15	705.52	797.08	82.37	91.56
	0.94	0.92	0.7	691.55	896.84	1031.67	205.29	134.83		0.96	0.94	0.76	604.94	707.85	995.84	102.91	287.99		1	1	0.92	550.68	631.1	759.52	80.42	128.42
	0.95	0.94	0.7	723.24	893.27	1194.58	170.03	301.31		0.96	0.94	0.78	636.03	747.85	969.47	111.82	221.62		1	0.98	0.83	562.25	647.02	742.61	84.77	95.59
	0.94	0.92	0.7	640.77	844.24	1023.74	203.47	179.5		0.95	0.95	0.74	656.65	781.77	981.69	125.12	199.92		1	1	0.88	629.82	706.25	809.72	76.43	103.47
Control Group	0.95	0.89	0.66	676.23	894.77	1108.16	218.54	213.39	Control Group	0.9	0.9	0.71	702.9	861	1072.98	158.1	211.98	Control Group	0.97	0.9	0.7	645.32	757.17	1078.43	111.85	321.26
	0.95	0.93	0.7	808.31	906.32	1124.02	98.01	217.7		0.94	0.94	0.68	726.61	895.35	1035.78	168.74	140.43		0.95	0.9	0.58	716.07	837.31	975.13	121.24	137.82
	0.93	0.91	0.64	695.56	872.18	1024.29	176.62	152.11		0.96	0.87	0.66	692.78	856.38	1076.44	163.6	220.06		0.9	0.95	0.8	666.5	853.31	1080.18	186.81	226.87
	0.95	0.89	0.75	675.4	895.26	1086.55	219.86	191.29		0.95	0.89	0.72	694.13	870.65	1074.03	176.52	203.38		0.95	0.9	0.73	656.35	783.19	1089.02	126.84	305.83
	0.94	0.9	0.6	697.95	845.05	1213.29	147.1	368.24		0.9	0.88	0.65	676.29	821.6	1027.98	145.31	206.38		0.97	0.94	0.53	645.2	828.4	1001.15	183.2	172.75
	0.94	0.89	0.66	728.31	903.68	1102.69	175.37	199.01		0.95	0.88	0.74	685.11	798.37	1034.94	113.26	236.57		0.92	0.9	0.72	733.03	869.81	1042.68	136.78	172.87
	0.96	0.91	0.64	664.9	830.63	1039.44	165.73	208.81		0.91	0.85	0.66	672.03	792.02	1001.44	119.99	209.42		0.98	0.94	0.7	674.23	846.05	1037.23	171.82	191.18
	0.94	0.92	0.66	751.81	902.4	1254.48	150.59	352.08		0.96	0.91	0.63	683.15	857.48	1076.29	174.33	218.81		0.97	0.95	0.65	650.9	788.27	986.61	137.37	198.34
	0.95	0.94	0.74	717.24	859.53	1148.13	142.29	288.6		0.93	0.93	0.74	711.94	886.93	1159.08	174.99	272.15		0.97	0.97	0.78	656.73	794.97	1015.87	138.24	220.9
	0.95	0.93	0.7	662.13	821.58	1105.4	159.45	283.82		0.94	0.95	0.74	692.56	821.92	1187.79	129.36	365.87		0.95	0.96	0.8	640.07	789.05	1076.43	148.98	287.38
	0.93	0.89	0.66	703.34	824.73	1058.69	121.39	233.96		0.96	0.9	0.65	723.74	894.83	1069.29	171.09	174.46		0.98	0.98	0.78	698.22	806.15	1086.15	107.93	280
	0.94	0.91	0.7	724.02	888.39	1104.79	164.37	216.4		0.96	0.94	0.75	754.02	888.39	1184.79	134.37	296.4		1	0.89	0.73	667.28	797.05	965.45	129.77	168.4
